# Supplementary material for: Effects of lanthanide metal size and amino ligand denticity on the solvothermal systems Ln/Sn/Se/en and Ln/Sn/Se/dien (Ln = lanthanide)
Source: Royal Society of Chemistry journal article supplement (doi:10.1039/c0dt01424a), 2011-01-01
Supplement: c0dt01424a.pdf [file c0dt01424a.pdf]

## Electronic Supplementary Information for

Effects of lanthanide metal size and amino ligand denticity on the solvothermal systems Ln/Sn/Se/en and Ln/Sn/Se/dien (Ln = lanthanide)

Jingjing Liang, Jiangfang Chen, Jing Zhao, Yingli Pan, Yong Zhang and Dingxian Jia\*

*College of Chemistry, Chemical Engineering and Materials Science, Soochow University, Suzhou 215123, People's Republic of China.*

### Syntheses of **1a–2c**

The title complexes **1a–1d** and **2a–2c** were prepared by solvothermal methods from Ln/Sn/Se/en and Ln/Sn/Se/dien systems respectively. The solvothermal reaction produce crystalline samples with the yield of 55%–71%. The IR spectra of a single crystal sample and bulk material sample were recorded to examine the phase purity of bulk materials of the reactions. The IR spectra of complexes **1a** and **2a** are presented in Fig. S-IR1 and Fig. S-IR2 below, which show that the bulk crystalline samples of the solvothermal reactions are phase pure.

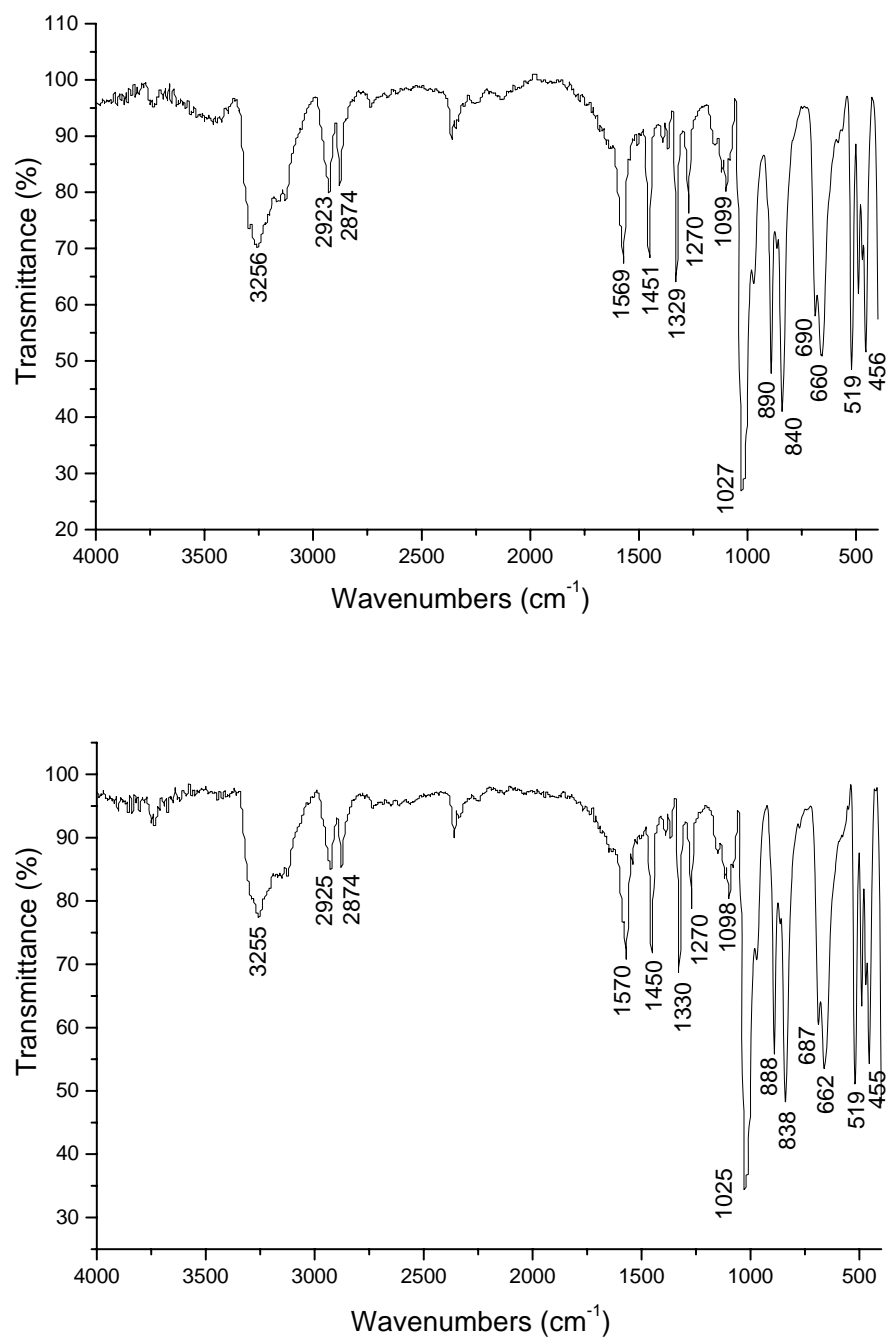

**Fig. S-IR1.** IR spectra of single crystal sample (top) and bulk material (bottom) of complex **1a**.

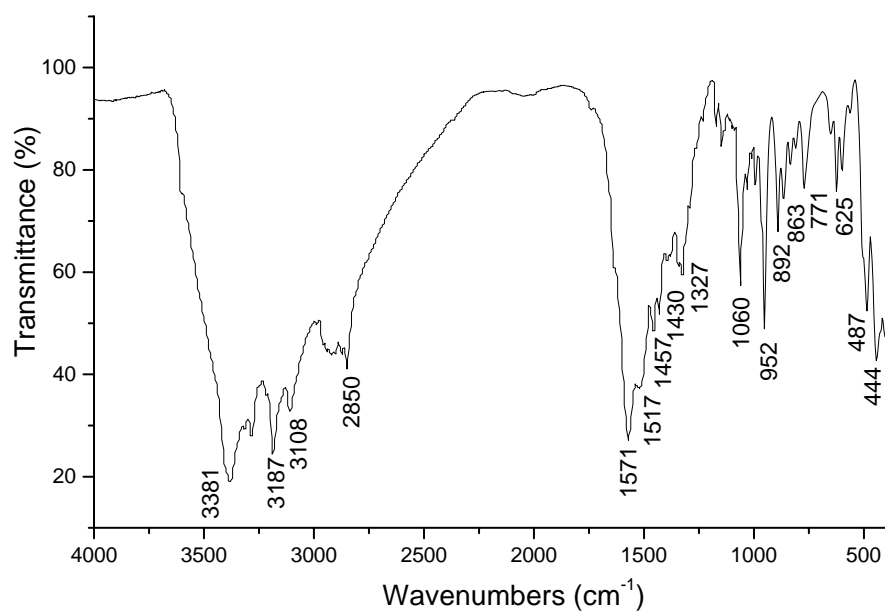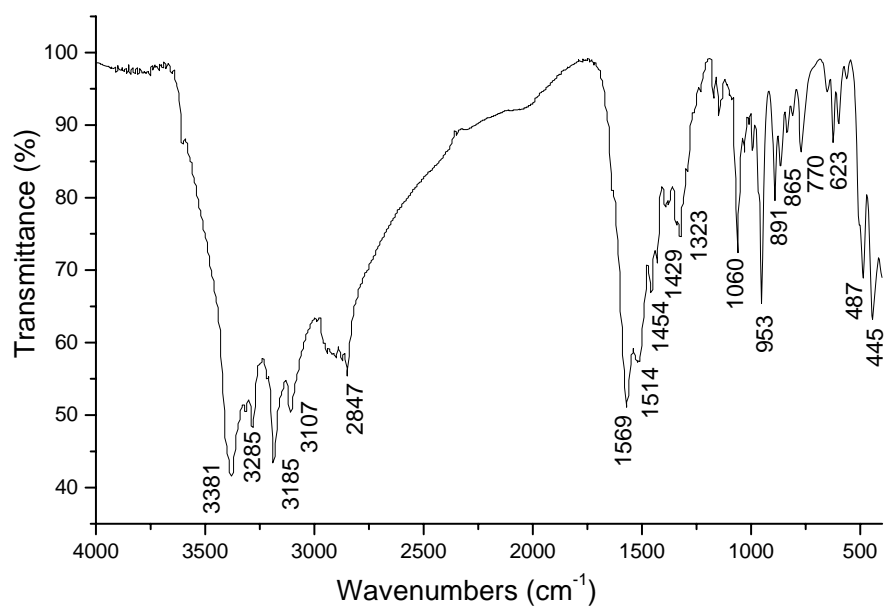

**Fig. S-IR2.** IR spectra of single crystal sample (top) and bulk material (bottom) of complex **2a**.

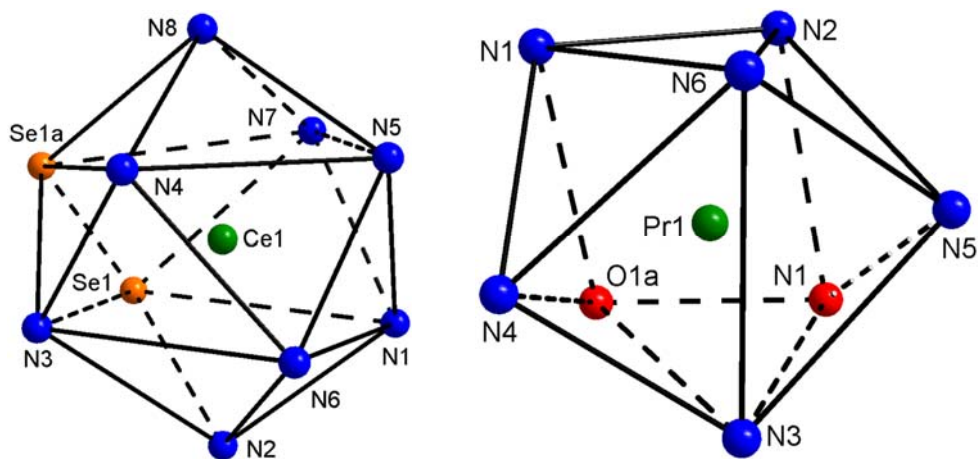

**Fig. S1** The bicapped square antiprism of  $\text{CeN}_8\text{Se}_2$  in **1a** (left) and bicapped trigonal prism of  $\text{PrN}_6\text{O}_2$  in **1b** (right).

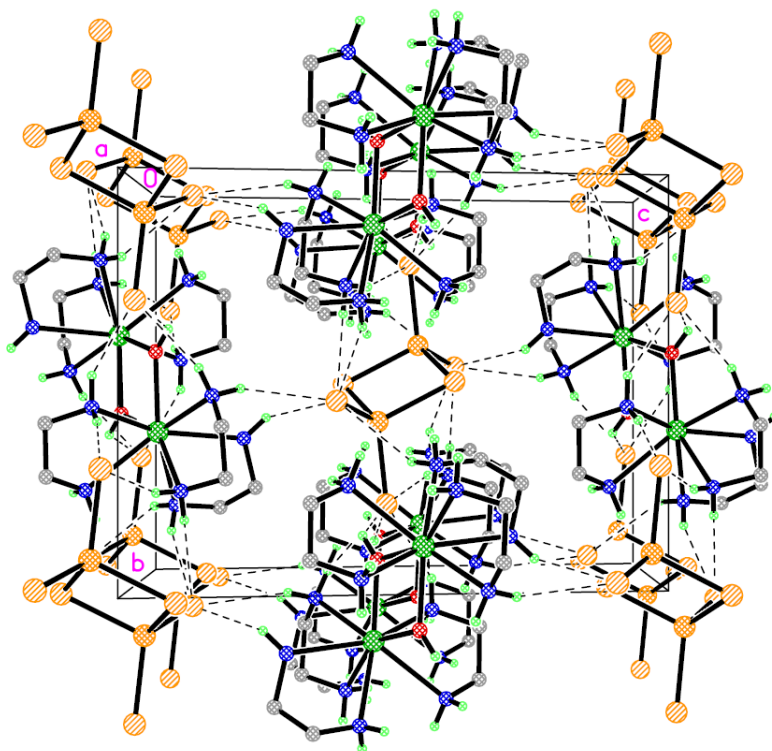

**Fig. S2** A section of crystal packing in **1b** showing the  $\text{N-H}\cdots\text{Se}$  interactions (shown in dashed lines).

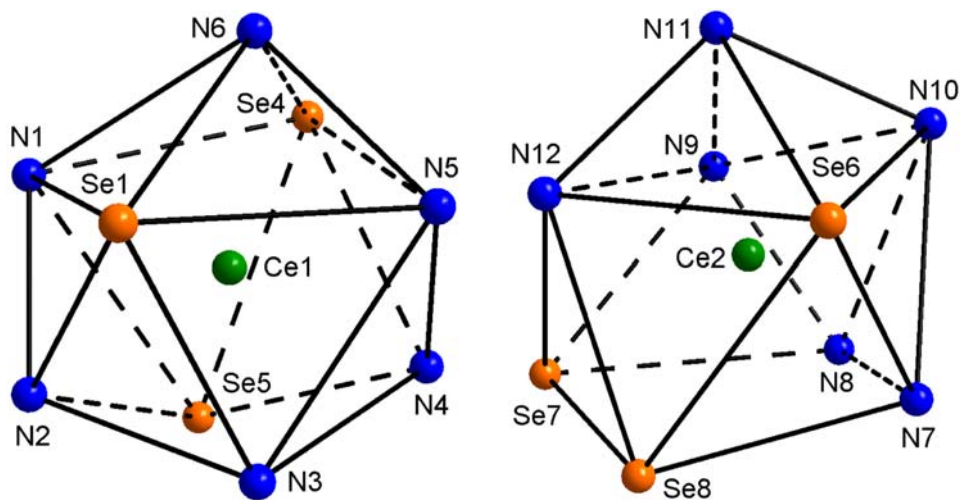

**Fig. S3** The monocapped square antiprisms of Ce(1)N<sub>6</sub>Se<sub>3</sub> (left) and Ce(2)N<sub>6</sub>Se<sub>3</sub> (right) in **2a**.

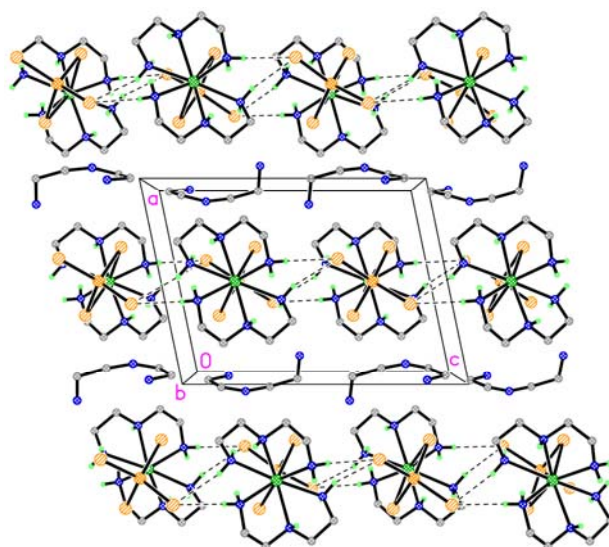

**Fig. S4** Crystal packing diagram of **2c** viewed along *b* axis. Hydrogen atoms of CH<sub>2</sub> are omitted for clarity.

**Table S1.** Selected bond lengths (Å) and angles (°) for **1a**

|                       |            |                     |             |
|-----------------------|------------|---------------------|-------------|
| Sn(1)–Se(2)           | 2.4567(6)  | Sn(1)–Se(3)         | 2.4648(6)   |
| Sn(1)–Se(4)           | 2.5870(6)  | Sn(1)–Se(4)#1       | 2.5868(6)   |
| Ce(1)–Se(1)           | 3.2183(6)  | Ce(1)–Se(1)#2       | 3.3034(6)   |
| Se(1)–Se(1)#2         | 2.3731(11) |                     |             |
| Ce(1)–N(1)            | 2.752(4)   | Ce(1)–N(2)          | 2.822(4)    |
| Ce(1)–N(3)            | 2.728(4)   | Ce(1)–N(4)          | 2.750(4)    |
| Ce(1)–N(5)            | 2.712(4)   | Ce(1)–N(6)          | 2.735(4)    |
| Ce(1)–N(7)            | 2.708(4)   | Ce(1)–N(8)          | 2.769(4)    |
| Se(2)–Sn(1)–Se(3)     | 114.40(2)  | Se(4)–Sn(1)–Se(4)#1 | 94.410(17)  |
| Se(2)–Sn(1)–Se(4)     | 110.83(2)  | Se(3)–Sn(1)–Se(4)   | 110.565(19) |
| Se(3)–Sn(1)–Se(4)#1   | 106.55(2)  | Se(2)–Sn(1)–Se(4)#1 | 118.29(2)   |
| Sn(1)–Se(4)–Sn(1) #1  | 85.590(17) | Ce(1)–Se(1)–Ce(1)#2 | 137.349(18) |
| Se(1)#2–Se(1)–Ce(1)#2 | 66.76(2)   | Se(1)#2–Se(1)–Ce(1) | 70.59(2)    |
| Se(1)–Ce(1)–Se(1)#2   | 42.651(18) | Se(1)–Ce(1)–N(1)    | 87.66(10)   |
| Se(1)–Ce(1)–N(2)      | 66.73(9)   | Se(1)–Ce(1)–N(3)    | 77.82(10)   |
| Se(1)–Ce(1)–N(4)      | 129.85(9)  | Se(1)–Ce(1)–N(5)    | 149.00(8)   |
| Se(1)–Ce(1)–N(6)      | 133.35(8)  | Se(1)–Ce(1)–N(7)    | 72.72(10)   |
| Se(1)–Ce(1)–N(8)      | 104.70(8)  | Se(1)#2–Ce(1)–N(1)  | 126.77(10)  |
| Se(1)#2–Ce(1)–N(2)    | 101.32(8)  | Se(1)#2–Ce(1)–N(3)  | 66.93(9)    |
| Se(1)#2–Ce(1)–N(4)    | 92.29(9)   | Se(1)#2–Ce(1)–N(5)  | 139.87(8)   |
| Se(1)#2–Ce(1)–N(6)    | 148.43(8)  | Se(1)#2–Ce(1)–N(7)  | 78.06(9)    |
| Se(1)#2–Ce(1)–N(8)    | 70.19(8)   | N(1)–Ce(1)–N(2)     | 61.95(12)   |
| N(1)–Ce(1)–N(3)       | 130.86(13) | N(1)–Ce(1)–N(4)     | 140.89(13)  |
| N(1)–Ce(1)–N(5)       | 71.03(12)  | N(1)–Ce(1)–N(6)     | 75.17(12)   |
| N(1)–Ce(1)–N(7)       | 67.53(13)  | N(1)–Ce(1)–N(8)     | 121.04(12)  |
| N(2)–Ce(1)–N(3)       | 69.20(13)  | N(2)–Ce(1)–N(4)     | 117.71(12)  |
| N(2)–Ce(1)–N(5)       | 117.94(11) | N(2)–Ce(1)–N(6)     | 66.89(12)   |
| N(2)–Ce(1)–N(7)       | 114.65(12) | N(2)–Ce(1)–N(8)     | 171.25(12)  |
| N(3)–Ce(1)–N(4)       | 61.39(13)  | N(3)–Ce(1)–N(5)     | 133.16(12)  |
| N(3)–Ce(1)–N(6)       | 81.53(12)  | N(3)–Ce(1)–N(7)     | 144.58(13)  |
| N(3)–Ce(1)–N(8)       | 108.07(12) | N(4)–Ce(1)–N(5)     | 77.33(12)   |
| N(4)–Ce(1)–N(6)       | 70.43(12)  | N(4)–Ce(1)–N(7)     | 127.65(13)  |
| N(4)–Ce(1)–N(8)       | 65.89(12)  | N(5)–Ce(1)–N(6)     | 63.61(11)   |
| N(5)–Ce(1)–N(7)       | 78.30(12)  | N(5)–Ce(1)–N(8)     | 70.20(11)   |
| N(6)–Ce(1)–N(7)       | 133.45(12) | N(6)–Ce(1)–N(8)     | 121.43(12)  |
| N(7)–Ce(1)–N(8)       | 62.41(12)  |                     |             |

Symmetry transformations used to generate equivalent atoms: #1  $-x+1, -y+1, -z+1$ ; #2  $-x+1, -y, -z+1$ .

**Table S2.** Selected bond lengths (Å) and angles (°) for **1b**

|                     |            |                     |            |
|---------------------|------------|---------------------|------------|
| Sn(1)–Se(1)         | 2.4545(6)  | Sn(1)–Se(3)#1       | 2.5873(6)  |
| Sn(1)–Se(2)         | 2.4671(6)  | Sn(1)–Se(3)         | 2.5826(7)  |
| Pr(1)···Pr(1)#2     | 3.8927(6)  |                     |            |
| Pr(1)–O(1)          | 2.363(3)   | Pr(1)–O(1)#2        | 2.345(3)   |
| Pr(1)–N(1)          | 2.681(4)   | Pr(1)–N(2)          | 2.600(4)   |
| Pr(1)–N(3)          | 2.667(5)   | Pr(1)–N(4)          | 2.642(4)   |
| Pr(1)–N(5)          | 2.668(4)   | Pr(1)–N(6)          | 2.636(4)   |
| Se(1)–Sn(1)–Se(2)   | 111.36(2)  | Se(1)–Sn(1)–Se(3)#1 | 113.65(2)  |
| Se(1)–Sn(1)–Se(3)   | 110.75(2)  | Se(2)–Sn(1)–Se(3)   | 114.01(2)  |
| Se(3)#1–Sn(1)–Se(2) | 112.59(2)  | Se(3)#1–Sn(1)–Se(3) | 93.400(19) |
| Sn(1)–Se(3)–Sn(1)#1 | 86.60(2)   | Pr(1)–O(1)–Pr(1)#2  | 111.55(14) |
| O(1)–Pr(1)–O(1)#2   | 68.45(14)  | O(1)–Pr(1)–N(1)     | 127.13(14) |
| O(1)–Pr(1)–N(2)     | 79.25(13)  | O(1)–Pr(1)–N(3)     | 92.95(14)  |
| O(1)–Pr(1)–N(4)     | 137.43(14) | O(1)–Pr(1)–N(5)     | 75.22(12)  |
| O(1)–Pr(1)–N(6)     | 137.65(12) | O(1)#2–Pr(1)–N(1)   | 80.13(14)  |
| O(1)#2–Pr(1)–N(2)   | 99.63(14)  | O(1)#2–Pr(1)–N(3)   | 99.59(15)  |
| O(1)#2–Pr(1)–N(4)   | 79.41(13)  | O(1)#2–Pr(1)–N(5)   | 142.83(12) |
| O(1)#2–Pr(1)–N(6)   | 152.65(12) | N(1)–Pr(1)–N(2)     | 65.04(15)  |
| N(1)–Pr(1)–N(3)     | 134.64(15) | N(1)–Pr(1)–N(4)     | 70.47(15)  |
| N(1)–Pr(1)–N(5)     | 130.52(14) | N(1)–Pr(1)–N(6)     | 75.75(14)  |
| N(2)–Pr(1)–N(3)     | 154.85(15) | N(2)–Pr(1)–N(4)     | 134.88(15) |
| N(2)–Pr(1)–N(5)     | 80.65(14)  | N(2)–Pr(1)–N(6)     | 81.79(15)  |
| N(3)–Pr(1)–N(4)     | 65.04(15)  | N(3)–Pr(1)–N(5)     | 74.22(14)  |
| N(3)–Pr(1)–N(6)     | 88.48(15)  | N(4)–Pr(1)–N(5)     | 126.32(14) |
| N(4)–Pr(1)–N(6)     | 80.51(14)  | N(5)–Pr(1)–N(6)     | 64.51(12)  |

Symmetry transformations used to generate equivalent atoms: #1  $-x+1, -y+1, -z+1$ ; #2  $-x+2, -y, -z+1$ .

**Table S3.** Selected bond lengths (Å) and angles (°) for **1c**

|                     |            |                     |            |
|---------------------|------------|---------------------|------------|
| Sn(1)–Se(1)         | 2.471(5)   | Sn(1)–Se(3)#1       | 2.581(4)   |
| Sn(1)–Se(2)         | 2.458(4)   | Sn(1)–Se(3)         | 2.588(5)   |
| Nd(1)···Nd(1)#2     | 3.878(4)   |                     |            |
| Nd(1)–O(1)          | 2.35(3)    | Nd(1)–O(1)#2        | 2.34(4)    |
| Nd(1)–N(1)          | 2.61(3)    | Nd(1)–N(2)          | 2.66(4)    |
| Nd(1)–N(3)          | 2.65(3)    | Nd(1)–N(4)          | 2.60(4)    |
| Nd(1)–N(5)          | 2.64(3)    | Nd(1)–N(6)          | 2.64(3)    |
| Se(1)–Sn(1)–Se(2)   | 111.24(17) | Se(1)–Sn(1)–Se(3)#1 | 113.91(17) |
| Se(1)–Sn(1)–Se(3)   | 113.00(16) | Se(2)–Sn(1)–Se(3)   | 113.51(18) |
| Se(3)#1–Sn(1)–Se(2) | 110.69(18) | Se(3)#1–Sn(1)–Se(3) | 93.42(14)  |
| Sn(1)–Se(3)–Sn(1)#1 | 86.58(14)  | Nd(1)–O(1)–Nd(1)#2  | 111.5(11)  |

---

|                   |           |                   |           |
|-------------------|-----------|-------------------|-----------|
| O(1)–Nd(1)–O(1)#2 | 68.5(11)  | O(1)–Nd(1)–N(1)   | 137.7(11) |
| O(1)–Nd(1)–N(2)   | 74.9(11)  | O(1)–Nd(1)–N(3)   | 127.0(11) |
| O(1)–Nd(1)–N(4)   | 79.2(11)  | O(1)–Nd(1)–N(5)   | 92.3(12)  |
| O(1)–Nd(1)–N(6)   | 136.9(12) | O(1)#2–Nd(1)–N(1) | 152.5(10) |
| O(1)#2–Nd(1)–N(2) | 142.6(10) | O(1)#2–Nd(1)–N(3) | 80.7(11)  |
| O(1)#2–Nd(1)–N(4) | 100.6(11) | O(1)#2–Nd(1)–N(5) | 99.7(13)  |
| O(1)#2–Nd(1)–N(6) | 79.7(10)  | N(1)–Nd(1)–N(2)   | 64.8(11)  |
| N(1)–Nd(1)–N(3)   | 75.1(11)  | N(1)–Nd(1)–N(4)   | 81.0(12)  |
| N(1)–Nd(1)–N(5)   | 88.9(13)  | N(1)–Nd(1)–N(6)   | 80.6(12)  |
| N(2)–Nd(1)–N(3)   | 129.7(11) | N(2)–Nd(1)–N(4)   | 79.4(11)  |
| N(2)–Nd(1)–N(5)   | 74.0(12)  | N(2)–Nd(1)–N(6)   | 125.8(11) |
| N(3)–Nd(1)–N(4)   | 64.9(11)  | N(3)–Nd(1)–N(5)   | 136.0(12) |
| N(3)–Nd(1)–N(6)   | 72.3(12)  | N(4)–Nd(1)–N(5)   | 153.3(12) |
| N(4)–Nd(1)–N(6)   | 136.5(12) | N(5)–Nd(1)–N(6)   | 64.6(11)  |

---

Symmetry transformations used to generate equivalent atoms:

#1  $-x+1, -y, -z+1$ ; #2  $-x+1, -y, -z$ .



**Table S4.** Selected bond lengths (Å) and angles (°) for **1d**

|                     |            |                     |            |
|---------------------|------------|---------------------|------------|
| Sn(1)–Se(1)         | 2.4609(8)  | Sn(1)–Se(3)#1       | 2.5887(8)  |
| Sn(1)–Se(2)         | 2.4626(8)  | Sn(1)–Se(3)         | 2.5787(8)  |
| Gd(1)···Gd(1)#2     | 3.8119(6)  |                     |            |
| Gd(1)–O(1)          | 2.312(4)   | Gd(1)–O(1)#2        | 2.295(4)   |
| Gd(1)–N(1)          | 2.609(5)   | Gd(1)–N(2)          | 2.530(5)   |
| Gd(1)–N(3)          | 2.557(5)   | Gd(1)–N(4)          | 2.609(5)   |
| Gd(1)–N(5)          | 2.573(5)   | Gd(1)–N(6)          | 2.579(5)   |
| Se(1)–Sn(1)–Se(2)   | 111.50(3)  | Se(1)–Sn(1)–Se(3)#1 | 113.21(3)  |
| Se(1)–Sn(1)–Se(3)   | 110.10(3)  | Se(2)–Sn(1)–Se(3)   | 114.06(3)  |
| Se(3)#1–Sn(1)–Se(2) | 113.13(3)  | Se(3)#1–Sn(1)–Se(3) | 93.74(2)   |
| Sn(1)–Se(3)–Sn(1)#1 | 86.26(2)   | Gd(1)–O(1)–Gd(1)#2  | 111.64(17) |
| O(1)–Gd(1)–O(1)#2   | 68.36(17)  | O(1)–Gd(1)–N(1)     | 128.67(16) |
| O(1)–Gd(1)–N(2)     | 80.50(16)  | O(1)–Gd(1)–N(3)     | 139.57(15) |
| O(1)–Gd(1)–N(4)     | 75.03(15)  | O(1)–Gd(1)–N(5)     | 135.11(17) |
| O(1)–Gd(1)–N(6)     | 88.78(15)  | O(1)#2–Gd(1)–N(1)   | 78.99(16)  |
| O(1)#2–Gd(1)–N(2)   | 99.31(16)  | O(1)#2–Gd(1)–N(3)   | 150.83(15) |
| O(1)#2–Gd(1)–N(4)   | 143.08(15) | O(1)#2–Gd(1)–N(5)   | 79.77(16)  |
| O(1)#2–Gd(1)–N(6)   | 100.61(17) | N(1)–Gd(1)–N(2)     | 66.64(17)  |
| N(1)–Gd(1)–N(3)     | 74.76(17)  | N(1)–Gd(1)–N(4)     | 130.53(16) |
| N(1)–Gd(1)–N(5)     | 71.13(17)  | N(1)–Gd(1)–N(6)     | 136.78(17) |
| N(2)–Gd(1)–N(3)     | 81.85(17)  | N(2)–Gd(1)–N(4)     | 78.76(16)  |
| N(2)–Gd(1)–N(5)     | 137.03(17) | N(2)–Gd(1)–N(6)     | 151.99(17) |
| N(3)–Gd(1)–N(4)     | 65.97(15)  | N(3)–Gd(1)–N(5)     | 79.90(17)  |
| N(3)–Gd(1)–N(6)     | 90.10(17)  | N(4)–Gd(1)–N(5)     | 126.49(16) |
| N(4)–Gd(1)–N(6)     | 73.47(16)  | N(5)–Gd(1)–N(6)     | 66.40(16)  |

Symmetry transformations used to generate equivalent atoms: #1  $-x+1, -y+1, -z+1$ ; #2  $-x+2, -y, -z+1$ .

**Table S5.** Selected bond lengths (Å) and angles (°) for **2a**

|                       |            |                     |            |
|-----------------------|------------|---------------------|------------|
| Sn(1)–Se(1)           | 2.4905(9)  | Sn(1)–Se(2)         | 2.4455(9)  |
| Sn(1)–Se(3)           | 2.5635(11) | Sn(1)–Se(3)#1       | 2.6142(11) |
| Sn(2)–Se(4)           | 2.4825(9)  | Sn(2)–Se(5)         | 2.4860(10) |
| Sn(2)–Se(6)           | 2.5145(10) | Sn(2)–Se(7)         | 2.5671(11) |
| Ce(1)–Se(1)           | 3.3989(10) | Ce(1)–Se(4)         | 3.2182(10) |
| Ce(1)–Se(5)           | 3.2847(8)  | Ce(2)–Se(6)         | 3.1167(8)  |
| Ce(2)–Se(7)#2         | 3.2088(9)  | Ce(2)–Se(8)         | 2.9806(5)  |
| Se(7)–Se(8)           | 2.6757(9)  |                     |            |
| Ce(1)–N(1)            | 2.682(6)   | Ce(1)–N(2)          | 2.676(7)   |
| Ce(1)–N(3)            | 2.695(6)   | Ce(1)–N(4)          | 2.689(7)   |
| Ce(1)–N(5)            | 2.710(7)   | Ce(1)–N(6)          | 2.702(6)   |
| Ce(2)–N(7)            | 2.647(7)   | Ce(2)–N(8)          | 2.700(6)   |
| Ce(2)–N(9)            | 2.737(7)   | Ce(2)–N(10)         | 2.717(6)   |
| Ce(2)–N(11)           | 2.732(8)   | Ce(2)–N(12)         | 2.719(7)   |
| Se(1)–Sn(1)–Se(2)     | 116.66(3)  | Se(3)–Sn(1)–Se(3)#1 | 93.93(3)   |
| Se(1)–Sn(1)–Se(3)     | 112.09(4)  | Se(2)–Sn(1)–Se(3)   | 112.34(4)  |
| Se(2)–Sn(1)–Se(3)#1   | 109.01(4)  | Se(1)–Sn(1)–Se(3)#1 | 110.45(4)  |
| Se(4)–Sn(2)–Se(5)     | 105.94(3)  | Se(4)–Sn(2)–Se(6)   | 111.56(3)  |
| Se(4)–Sn(2)–Se(7)     | 104.28(4)  | Se(5)–Sn(2)–Se(6)   | 108.69(4)  |
| Se(5)–Sn(2)–Se(7)     | 118.18(3)  | Se(6)–Sn(2)–Se(7)   | 108.13(3)  |
| Sn(1)–Se(1)–Ce(1)     | 111.31(3)  | Sn(1)–Se(3)–Sn(1)#1 | 86.07(3)   |
| Sn(2)–Se(4)–Ce(1)     | 87.00(3)   | Sn(2)–Se(5)–Ce(1)   | 85.48(3)   |
| Sn(2)–Se(6)–Ce(2)     | 105.69(3)  | Sn(2)–Se(7)–Se(8)   | 90.93(3)   |
| Sn(2)–Se(7)–Ce(2)#2   | 121.27(3)  | Se(8)–Se(7)–Ce(2)#2 | 60.055(18) |
| Se(7)#2–Se(8)–Ce(2)#2 | 111.12(2)  | Se(7)#2–Se(8)–Ce(2) | 68.88(2)   |
| Ce(8)–Se(8)–Ce(2)#2   | 180.       | Se(7)–Se(8)–Se(7)#2 | 180.0      |
| Se(1)–Ce(1)–Se(4)     | 136.98(2)  | Se(1)–Ce(1)–Se(5)   | 143.15(3)  |
| Se(4)–Ce(1)–Se(5)     | 75.16(2)   |                     |            |
| Se(1)–Ce(1)–N(1)      | 86.67(14)  | Se(1)–Ce(1)–N(2)    | 68.54(13)  |
| Se(1)–Ce(1)–N(3)      | 71.10(14)  | Se(1)–Ce(1)–N(4)    | 127.87(14) |
| Se(1)–Ce(1)–N(5)      | 75.18(17)  | Se(1)–Ce(1)–N(6)    | 72.60(15)  |
| Se(4)–Ce(1)–N(1)      | 78.30(16)  | Se(4)–Ce(1)–N(2)    | 133.25(13) |
| Se(4)–Ce(1)–N(3)      | 147.70(16) | Se(4)–Ce(1)–N(4)    | 76.63(15)  |
| Se(4)–Ce(1)–N(5)      | 90.80(16)  | Se(4)–Ce(1)–N(6)    | 64.71(15)  |
| Se(5)–Ce(1)–N(1)      | 83.55(13)  | Se(5)–Ce(1)–N(2)    | 75.37(13)  |
| Se(5)–Ce(1)–N(3)      | 86.67(13)  | Se(5)–Ce(1)–N(4)    | 67.22(13)  |
| Se(5)–Ce(1)–N(5)      | 131.28(17) | Se(5)–Ce(1)–N(6)    | 137.59(14) |
| N(1)–Ce(1)–N(2)       | 63.0(2)    | N(1)–Ce(1)–N(3)     | 126.6(2)   |
| N(1)–Ce(1)–N(4)       | 145.38(19) | N(1)–Ce(1)–N(5)     | 139.7(2)   |
| N(1)–Ce(1)–N(6)       | 75.7(2)    | N(2)–Ce(1)–N(3)     | 63.7(2)    |
| N(2)–Ce(1)–N(4)       | 122.4(2)   | N(2)–Ce(1)–N(5)     | 135.7(2)   |
| N(2)–Ce(1)–N(6)       | 123.6(2)   | N(3)–Ce(1)–N(4)     | 71.7(2)    |
| N(3)–Ce(1)–N(5)       | 81.3(2)    | N(3)–Ce(1)–N(6)     | 135.21(19) |
| N(4)–Ce(1)–N(5)       | 64.2(2)    | N(4)–Ce(1)–N(6)     | 113.5(2)   |

---

|                     |            |                     |            |
|---------------------|------------|---------------------|------------|
| N(5)–Ce(1)–N(6)     | 64.7(2)    | Se(6)–Ce(2)–Se(7)#2 | 130.94(2)  |
| Se(6)–Ce(2)–Se(8)   | 87.73(2)   | Se(7)#2–Ce(2)–Se(8) | 51.065(19) |
| Se(6)–Ce(2)–N(7)    | 70.44(12)  | Se(6)–Ce(2)–N(8)    | 132.88(14) |
| Se(6)–Ce(2)–N(9)    | 147.88(19) | Se(6)–Ce(2)–N(10)   | 79.46(14)  |
| Se(6)–Ce(2)–N(11)   | 75.35(15)  | Se(6)–Ce(2)–N(12)   | 76.62(13)  |
| Se(7)#2–Ce(2)–N(7)  | 112.26(14) | Se(7)#2–Ce(2)–N(8)  | 79.54(13)  |
| Se(7)#2–Ce(2)–N(9)  | 72.92(18)  | Se(7)#2–Ce(2)–N(10) | 149.42(14) |
| Se(7)#2–Ce(2)–N(11) | 114.64(15) | Se(7)#2–Ce(2)–N(12) | 68.09(14)  |
| Se(8)–Ce(2)–N(7)    | 73.27(14)  | Se(8)–Ce(2)–N(8)    | 90.53(15)  |
| Se(8)–Ce(2)–N(9)    | 122.29(18) | Se(8)–Ce(2)–N(10)   | 151.02(17) |
| Se(8)–Ce(2)–N(11)   | 136.94(15) | Se(8)–Ce(2)–N(12)   | 74.25(17)  |
| N(7)–Ce(2)–N(8)     | 64.07(19)  | N(7)–Ce(2)–N(9)     | 125.5(2)   |
| N(7)–Ce(2)–N(10)    | 78.0(2)    | N(7)–Ce(2)–N(11)    | 132.8(2)   |
| N(7)–Ce(2)–N(12)    | 134.0(2)   | N(8)–Ce(2)–N(9)     | 64.1(2)    |
| N(8)–Ce(2)–N(10)    | 79.8(2)    | N(8)–Ce(2)–N(11)    | 129.8(2)   |
| N(8)–Ce(2)–N(12)    | 147.04(18) | N(9)–Ce(2)–N(10)    | 77.8(2)    |
| N(9)–Ce(2)–N(11)    | 74.5(2)    | N(9)–Ce(2)–N(12)    | 99.3(2)    |
| N(10)–Ce(2)–N(11)   | 64.4(2)    | N(10)–Ce(2)–N(12)   | 126.5(2)   |
| N(11)–Ce(2)–N(12)   | 63.5(2)    |                     |            |

---

Symmetry transformations used to generate equivalent atoms: #1  $-x, -y+1, -z+1$ ; #2  $-x+2, -y, -z$ .

**Table S6.** Selected bond lengths (Å) and angles (°) for **2b**

|                       |            |                     |             |
|-----------------------|------------|---------------------|-------------|
| Sn(1)–Se(1)           | 2.4906(10) | Sn(1)–Se(2)         | 2.4481(10)  |
| Sn(1)–Se(3)           | 2.5559(11) | Sn(1)–Se(3)#1       | 2.6143(11)  |
| Sn(2)–Se(4)           | 2.4831(11) | Sn(2)–Se(5)         | 2.4817(10)  |
| Sn(2)–Se(6)           | 2.5162(9)  | Sn(2)–Se(7)         | 2.5572(10)  |
| Nd(1)–Se(1)           | 3.4046(11) | Nd(1)–Se(4)         | 3.2605(9)   |
| Nd(1)–Se(5)           | 3.1867(11) | Nd(2)–Se(6)         | 3.0712(9)   |
| Nd(2)–Se(7)#2         | 3.1871(9)  | Nd(2)–Se(8)         | 2.9575(5)   |
| Se(7)–Se(8)           | 2.6758(9)  |                     |             |
| Nd(1)–N(1)            | 2.610(6)   | Nd(1)–N(2)          | 2.651(6)    |
| Nd(1)–N(3)            | 2.632(7)   | Nd(1)–N(4)          | 2.618(7)    |
| Nd(1)–N(5)            | 2.599(7)   | Nd(1)–N(6)          | 2.620(6)    |
| Nd(2)–N(7)            | 2.594(7)   | Nd(2)–N(8)          | 2.646(7)    |
| Nd(2)–N(9)            | 2.670(6)   | Nd(2)–N(10)         | 2.654(6)    |
| Nd(2)–N(11)           | 2.666(7)   | Nd(2)–N(12)         | 2.667(7)    |
| Se(1)–Sn(1)–Se(2)     | 116.50(3)  | Se(3)–Sn(1)–Se(3)#1 | 93.81(3)    |
| Se(1)–Sn(1)–Se(3)     | 111.97(4)  | Se(2)–Sn(1)–Se(3)   | 112.86(4)   |
| Se(2)–Sn(1)–Se(3)#1   | 108.69(4)  | Se(1)–Sn(1)–Se(3)#1 | 110.65(3)   |
| Se(4)–Sn(2)–Se(5)     | 105.47(3)  | Se(4)–Sn(2)–Se(6)   | 108.22(4)   |
| Se(4)–Sn(2)–Se(7)     | 118.35(3)  | Se(5)–Sn(2)–Se(6)   | 112.00(3)   |
| Se(5)–Sn(2)–Se(7)     | 104.62(4)  | Se(6)–Sn(2)–Se(7)   | 108.19(3)   |
| Sn(1)–Se(1)–Nd(1)     | 111.37(4)  | Sn(1)–Se(3)–Sn(1)#1 | 86.19(3)    |
| Sn(2)–Se(4)–Nd(1)     | 85.58(3)   | Sn(2)–Se(5)–Nd(1)   | 87.23(3)    |
| Sn(2)–Se(6)–Nd(2)     | 106.05(3)  | Sn(2)–Se(7)–Se(8)   | 90.72(3)    |
| Sn(2)–Se(7)–Nd(2)#2   | 121.43(4)  | Se(8)–Se(7)–Nd(2)#2 | 59.834(18)  |
| Se(7)#2–Se(8)–Nd(2)#2 | 68.702(19) | Se(7)#2–Se(8)–Nd(2) | 111.298(19) |
| Nd(8)–Se(8)–Nd(2)#2   | 180.0      | Se(7)–Se(8)–Se(7)#2 | 180.0       |
| Se(1)–Nd(1)–Se(4)     | 142.55(3)  | Se(1)–Nd(1)–Se(5)   | 137.08(3)   |
| Se(4)–Nd(1)–Se(5)     | 75.59(2)   |                     |             |
| Se(1)–Nd(1)–N(1)      | 129.19(15) | Se(1)–Nd(1)–N(2)    | 74.59(16)   |
| Se(1)–Nd(1)–N(3)      | 72.77(17)  | Se(1)–Nd(1)–N(4)    | 70.95(15)   |
| Se(1)–Nd(1)–N(5)      | 68.26(14)  | Se(1)–Nd(1)–N(6)    | 86.68(15)   |
| Se(4)–Nd(1)–N(1)      | 66.54(15)  | Se(4)–Nd(1)–N(2)    | 132.02(15)  |
| Se(4)–Nd(1)–N(3)      | 137.41(16) | Se(4)–Nd(1)–N(4)    | 87.08(15)   |
| Se(4)–Nd(1)–N(5)      | 75.07(14)  | Se(4)–Nd(1)–N(6)    | 83.88(14)   |
| Se(5)–Nd(1)–N(1)      | 75.58(17)  | Se(5)–Nd(1)–N(2)    | 91.50(18)   |
| Se(5)–Nd(1)–N(3)      | 64.55(17)  | Se(5)–Nd(1)–N(4)    | 147.24(15)  |
| Se(5)–Nd(1)–N(5)      | 133.35(14) | Se(5)–Nd(1)–N(6)    | 77.72(17)   |
| N(1)–Nd(1)–N(2)       | 65.5(2)    | N(1)–Nd(1)–N(3)     | 114.3(2)    |
| N(1)–Nd(1)–N(4)       | 72.0(2)    | N(1)–Nd(1)–N(5)     | 122.6(2)    |
| N(1)–Nd(1)–N(6)       | 144.1(2)   | N(2)–Nd(1)–N(3)     | 65.8(2)     |
| N(2)–Nd(1)–N(4)       | 79.6(2)    | N(2)–Nd(1)–N(5)     | 134.9(2)    |
| N(2)–Nd(1)–N(6)       | 139.0(2)   | N(3)–Nd(1)–N(4)     | 135.1(2)    |
| N(3)–Nd(1)–N(5)       | 122.8(2)   | N(3)–Nd(1)–N(6)     | 73.9(2)     |
| N(4)–Nd(1)–N(5)       | 64.8(2)    | N(4)–Nd(1)–N(6)     | 128.5(2)    |

---

|                     |            |                     |            |
|---------------------|------------|---------------------|------------|
| N(5)–Nd(1)–N(6)     | 63.8(2)    | Se(6)–Nd(2)–Se(7)#2 | 131.60(2)  |
| Se(6)–Nd(2)–Se(8)   | 88.105(19) | Se(7)#2–Nd(2)–Se(8) | 51.464(17) |
| Se(6)–Nd(2)–N(7)    | 69.90(14)  | Se(6)–Nd(2)–N(8)    | 133.39(14) |
| Se(6)–Nd(2)–N(9)    | 146.44(17) | Se(6)–Nd(2)–N(10)   | 79.41(14)  |
| Se(6)–Nd(2)–N(11)   | 75.00(14)  | Se(6)–Nd(2)–N(12)   | 77.37(13)  |
| Se(7)#2–Nd(2)–N(7)  | 112.80(13) | Se(7)#2–Nd(2)–N(8)  | 78.96(13)  |
| Se(7)#2–Nd(2)–N(9)  | 72.66(16)  | Se(7)#2–Nd(2)–N(10) | 148.85(14) |
| Se(7)#2–Nd(2)–N(11) | 114.85(15) | Se(7)#2–Nd(2)–N(12) | 67.59(13)  |
| Se(8)–Nd(2)–N(7)    | 73.17(13)  | Se(8)–Nd(2)–N(8)    | 90.43(13)  |
| Se(8)–Nd(2)–N(9)    | 122.79(16) | Se(8)–Nd(2)–N(10)   | 150.33(16) |
| Se(8)–Nd(2)–N(11)   | 137.38(15) | Se(8)–Nd(2)–N(12)   | 74.15(14)  |
| N(7)–Nd(2)–N(8)     | 65.2(2)    | N(7)–Nd(2)–N(9)     | 127.7(2)   |
| N(7)–Nd(2)–N(10)    | 77.3(2)    | N(7)–Nd(2)–N(11)    | 132.1(2)   |
| N(7)–Nd(2)–N(12)    | 133.9(2)   | N(8)–Nd(2)–N(9)     | 65.3(2)    |
| N(8)–Nd(2)–N(10)    | 79.3(2)    | N(8)–Nd(2)–N(11)    | 129.5(2)   |
| N(8)–Nd(2)–N(12)    | 145.92(18) | N(9)–Nd(2)–N(10)    | 78.1(2)    |
| N(9)–Nd(2)–N(11)    | 73.0(2)    | N(9)–Nd(2)–N(12)    | 97.4(2)    |
| N(10)–Nd(2)–N(11)   | 64.9(2)    | N(10)–Nd(2)–N(12)   | 127.8(2)   |
| N(11)–Nd(2)–N(12)   | 64.2(2)    |                     |            |

---

Symmetry transformations used to generate equivalent atoms: #1  $-x+3, -y, -z$ ;  
#2  $-x+1, -y+1, -z+1$ .

**Table S7.** Selected bond lengths (Å) and angles (°) for **2c**

|                           |            |                           |            |
|---------------------------|------------|---------------------------|------------|
| Sn(1)–Se(1)               | 2.5403(7)  | Sn(1)–Se(2)               | 2.5009(7)  |
| Gd(1)–Se(1)               | 2.9341(7)  | Gd(1)–N(1)                | 2.600(4)   |
| Gd(1)–N(2)                | 2.589(5)   | Gd(1)–N(3)                | 2.578(4)   |
| Se(1)–Sn(1)–Se(1)#1       | 104.92(3)  | Se(1)–Sn(1)–Se(2)         | 112.06(2)  |
| Se(1)–Sn(1)–Se(2)#1       | 105.41(2)  | Se(2)–Sn(1)–Se(2)#1       | 116.49(3)  |
| Sn(1)–Se(1)–Gd(1)         | 84.18(2)   |                           |            |
| Se(1)–Gd(1)–Se(1)#1       | 86.71(3)   | Se(1)–Gd(1)–N(1)          | 74.40(11)  |
| Se(1)–Gd(1)–N(2)          | 140.39(10) | Se(1)–Gd(1)–N(3)          | 153.91(10) |
| Se(1)–Gd(1)–N(1)#1        | 82.22(11)  | Se(1)–Gd(1)–N(2)#1        | 84.39(11)  |
| Se(1)–Gd(1)–N(3)#1        | 91.07(11)  | N(1)–Gd(1)–N(2)           | 66.18(15)  |
| N(1)–Gd(1)–N(3)           | 131.05(15) | N(1)–Gd(1)–N(1)#1         | 147.7(2)   |
| N(1)–Gd(1)–N(2)#1         | 131.37(16) | N(1)–Gd(1)–N(3)#1         | 72.17(15)  |
| N(2)–Gd(1)–N(3)           | 64.91(14)  | N(2)–Gd(1)–N(2)#1         | 124.9(2)   |
| N(2)–Gd(1)–N(3)#1         | 80.84(15)  | N(3)–Gd(1)–N(3)#1         | 101.8(2)   |
| Se(1)#1–Sn(1)–Se(1)–Gd(1) | 0          | Sn(1)–Se(1)–Gd(1)–Se(1)#1 | 0          |

Symmetry transformations used to generate equivalent atoms: #1  $x+1, y, -z+3/2$ .
